# Supplementary material for: Improving Visual Field Examination of the Macula Using Structural Information
Source: PubMed Central journal article supplement — Transl Vis Sci Technol. 2018 Dec 28;7(6):36. doi: 10.1167/tvst.7.6.36 (PMC6314223; doi:10.1167/tvst.7.6.36), 2018-12-28
Supplement: tvst-07-06-34_s01.pdf [file tvst-07-06-34_s01.pdf]

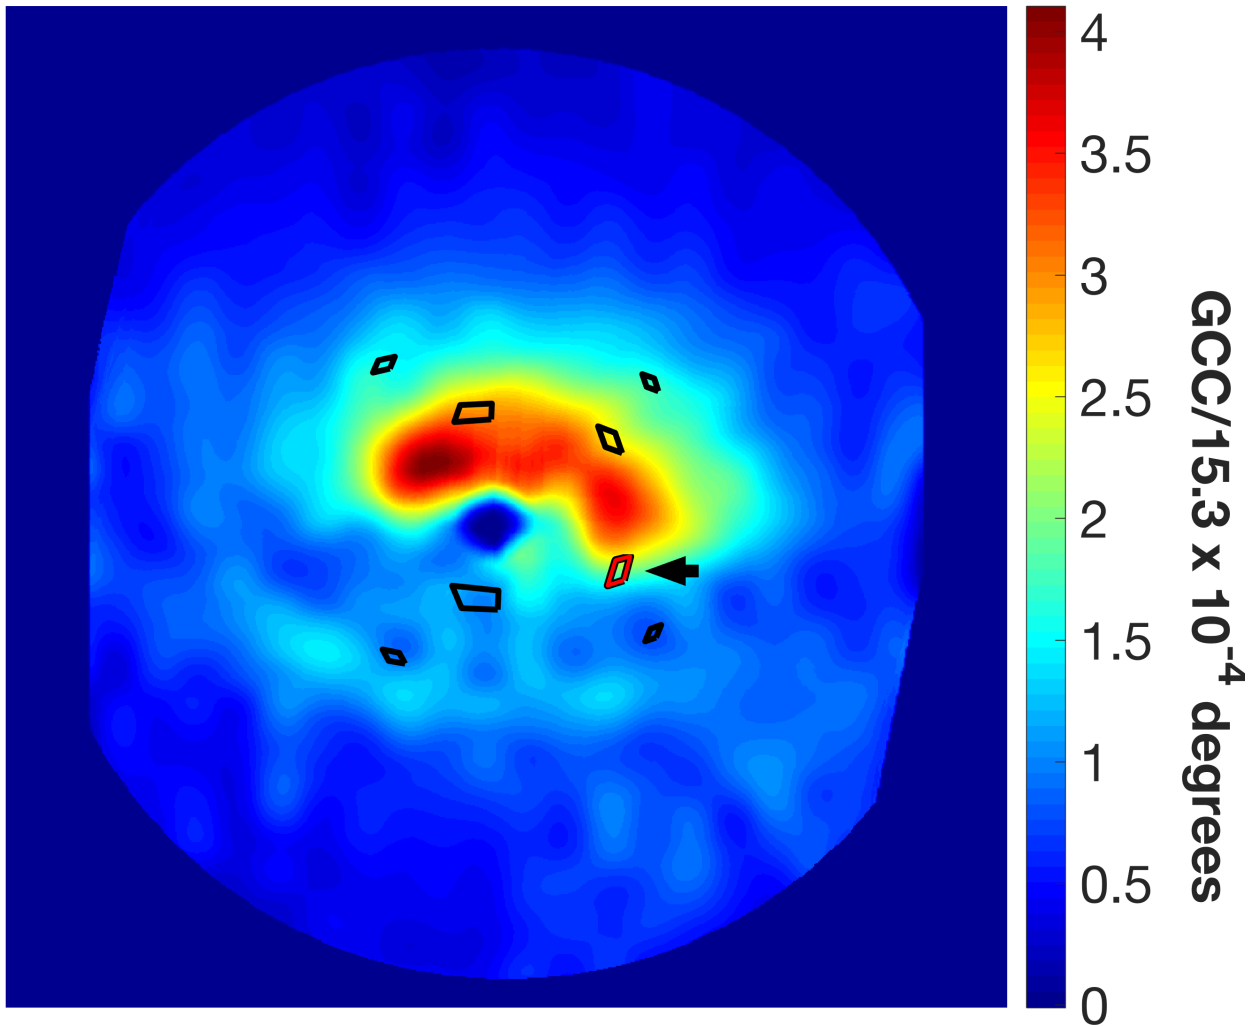

**Supplementary Figure 1.** Edge effect on a single location. The red region (indicated by the black arrow) had the following thresholds determined by the three tests with full threshold staircase: 7 dB, 19 dB, 19 dB. This sequence yielded a final average of 15 dB. This was lower than the threshold predicted by the structure – function model (28 dB).
